# Supplementary material for: The effect of psychological capital on athlete burnout: the mediating role of coping strategies and the moderating effect of perceived stress
Source: Research Square preprint supplement (doi:10.21203/rs.3.rs-5383004/v1), 2024-11-18
Supplement: Supplementary file 1 [file eb293b01625748fc17695dc8.docx]

# Appendix

| Table 1 Simple moderating effects of perceived stress between psychological capital and coping strategies | | | | | | | | | | | | | | | |
| --- | --- | --- | --- | --- | --- | --- | --- | --- | --- | --- | --- | --- | --- | --- | --- |
|  | Model 1 | | | | | Model 2 | | | | | Model 3 | | | | |
| Β | standard error | *t* | *p* | β | Β | standard error | *t* | *p* | β | Β | standard error | *t* | *p* | β |
| Constant | 0.000 | 0.049 | 0.000 | 1.000 | - | 0.000 | 0.049 | 0.000 | 1.000 | - | 0.059 | 0.043 | 1.369 | 0.172 | - |
| Psychological capital | 1.975 | 0.057 | 34.453 | 0.000** | 0.881 | 1.954 | 0.057 | 34.055 | 0.000** | 0.872 | 1.924 | 0.050 | 38.653 | 0.000** | 0.858 |
| Perceived stress |  |  |  |  |  | -0.010 | 0.004 | -2.585 | 0.010* | -0.066 | -0.014 | 0.003 | -4.155 | 0.000** | -0.093 |
| Psychological capital* Perceived stress |  |  |  |  |  |  |  |  |  |  | 0.038 | 0.004 | 10.710 | 0.000** | 0.237 |
| *R* 2 | 0.776 | | | | | 0.781 | | | | | 0.836 | | | | |
| Adjustment *R* 2 | 0.776 | | | | | 0.779 | | | | | 0.835 | | | | |
| *F* Value  | *F* (1,342)=1187.006,p=0.000 | | | | | *F* (2,341)=606.704,p=0.000 | | | | | *F* (3,340)=577.562,p=0.000 | | | | |
| *△R* 2 | 0.776 | | | | | 0.004 | | | | | 0.055 | | | | |
| *△F* value  | *F* (1,342)=1187.006,p=0.000 | | | | | *F* (1,341)=6.682,p=0.010 | | | | | *F* (1,340)=114.698,p=0.000 | | | | |
| Note: Dependent variable = coping strategies | | | | | | | | | | | | | | | |
| * p<0.05 ** p<0.01 | | | | | | | | | | | | | | | |

| Table 2 Simple moderating effects of perceived stress between psychological capital and athlete anxiety | | | | | | | | | | | | | | | |
| --- | --- | --- | --- | --- | --- | --- | --- | --- | --- | --- | --- | --- | --- | --- | --- |
|  | Model 1 | | | | | Model 2 | | | | | Model 3 | | | | |
| Β | standard error | *t* | *p* | β | Β | standard error | *t* | *p* | β | Β | standard error | *t* | *p* | β |
| Constant | 2.945 | 0.021 | 142.208 | 0.000** | - | 2.945 | 0.021 | 142.229 | 0.000** | - | 2.904 | 0.018 | 162.230 | 0.000** | - |
| Response strategy | -0.303 | 0.011 | -28.268 | 0.000** | -0.837 | -0.305 | 0.011 | -27.975 | 0.000** | -0.843 | -0.252 | 0.010 | -24.433 | 0.000** | -0.696 |
| Perceived stress |  |  |  |  |  | -0.002 | 0.002 | -1.049 | 0.295 | -0.032 | 0.001 | 0.001 | 0.820 | 0.413 | 0.021 |
| Coping strategies* Perceived stress |  |  |  |  |  |  |  |  |  |  | -0.009 | 0.001 | -11.606 | 0.000** | -0.326 |
| *R* 2 | 0.700 | | | | | 0.701 | | | | | 0.786 | | | | |
| Adjustment *R* 2 | 0.699 | | | | | 0.700 | | | | | 0.784 | | | | |
| *F* Value  | *F* (1,342)=799.102,p=0.000 | | | | | *F* (2,341)=400.220,p=0.000 | | | | | *F* (3,340)=416.320, p=0.000 | | | | |
| *△R* 2 | 0.700 | | | | | 0.001 | | | | | 0.085 | | | | |
| *△F* value  | *F* (1,342)=799.102,p=0.000 | | | | | *F* (1,341)=1.101,p=0.295 | | | | | *F* (1,340)=134.695,p=0.000 | | | | |
| Note: Dependent Variable = Athlete Anxiety | | | | | | | | | | | | | | | |
| * p<0.05 ** p<0.01 | | | | | | | | | | | | | | | |

| Table 3 Simple slope analysis of reconciliation benefits | | | | | |
| --- | --- | --- | --- | --- | --- |
| Regulatory relationship | Level of moderating variables | Regression coefficient | *t* | 95% CI | |
| 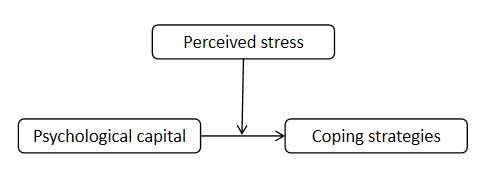 | average value | 1.924** | 38.653 | 1.826 | 2.021 |
| High level (+1SD) | 2.420** | 36.642 | 2.291 | 2.550 |
| Low level (-1SD) | 1.428** | 20.421 | 1.291 | 1.565 |
| 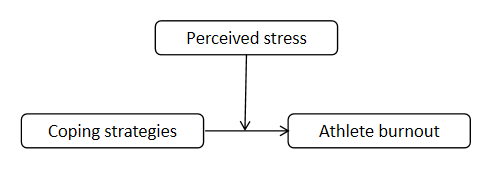 | average value | -0.252** | -24.433 | -0.272 | -0.232 |
| High level (+1SD) | -0.367** | -34.422 | -0.387 | -0.346 |
| Low level (-1SD) | -0.138** | -8.041 | -0.171 | -0.104 |
| * p<0.05 ** p<0.01 | | | | | |

| Table 4 List of Research Targets | | | |
| --- | --- | --- | --- |
| Subject | Options | Frequency | Percentage |
| Sexes | male | 178 | 51.7 |
| women | 166 | 48.3 |
| Age | 12-15 years | 108 | 31.4 |
| 15-18 years | 101 | 29.4 |
| 18-22 years | 71 | 20.6 |
| 22 and over | 64 | 18.6 |
| Sporting event | Athletics (high jump, long jump, shot put, discus, sprints, distance running, etc.) | 127 | 36.9 |
| Ball games (basketball, soccer, table tennis, volleyball, tennis, etc.) | 89 | 25.9 |
| Gymnastics (free weights, aerobics, bars, vault, etc.) | 48 | 14 |
| Martial Arts (Taijiquan, Changquan, Nanquan, etc.) | 33 | 9.6 |
| Ice and snow (skating, skiing, hockey, curling, etc.) | 30 | 8.7 |
| Judo Classes (Taekwondo, Judo, Wrestling, etc.) | 17 | 4.9 |
| Athlete level | extra-curricular | 85 | 24.7 |
| three-tier | 106 | 30.8 |
| category B | 75 | 21.8 |
| first class | 44 | 12.8 |
| healthy person | 28 | 8.1 |
| national level (e.g. nature reserve) | 6 | 1.7 |
| Training years | 1-3 years | 106 | 30.8 |
| 3-5 years | 163 | 47.4 |
| 5-8 years | 55 | 16 |
| 8 years and above | 20 | 5.8 |
